# Supplementary material for: Theoretical modeling on the kinetics of the arsenate-ester hydrolysis: implications to the stability of As-DNA
Source: Royal Society of Chemistry journal article supplement (doi:10.1039/c1cp20423h), 2011-01-01
Supplement: c1cp20423h.pdf [file c1cp20423h.pdf]

## Supplementary Information to the paper

### **Theoretical modeling on the kinetics of the arsenate-ester hydrolysis: implications to the stability of As-DNA**

*Arnošt Mládek,<sup>a</sup> Jiří Šponer,<sup>a</sup> Bobby G. Sumpter,<sup>b</sup>  
Miguel Fuentes-Cabrera,<sup>b\*</sup> and Judit E. Šponer<sup>a\*</sup>*

<sup>a</sup> Institute of Biophysics, Academy of Sciences of the Czech Republic, Královopolská 135,  
CZ-61265, Brno, Czech Republic

<sup>b</sup> Center for Nanophase Materials Sciences, and Computer Sciences and Mathematics Division,  
Oak Ridge National Laboratory, Oak Ridge, P. O. Box 2008, Oak Ridge, TN 37831-6494, USA

\*corresponding authors: [judit@ncbr.chemi.muni.cz](mailto:judit@ncbr.chemi.muni.cz), [fuentesabma@ornl.gov](mailto:fuentesabma@ornl.gov)

#### **Content:**

|                                                                                        |           |
|----------------------------------------------------------------------------------------|-----------|
| Analysis of the variation of the reaction free energies                                | p. S2     |
| Optimized geometries of the computed models obtained<br>at B3LYP/6-311++G(2d,2p) level | p. S3-S23 |

## Analysis of the variation of the reaction free energies

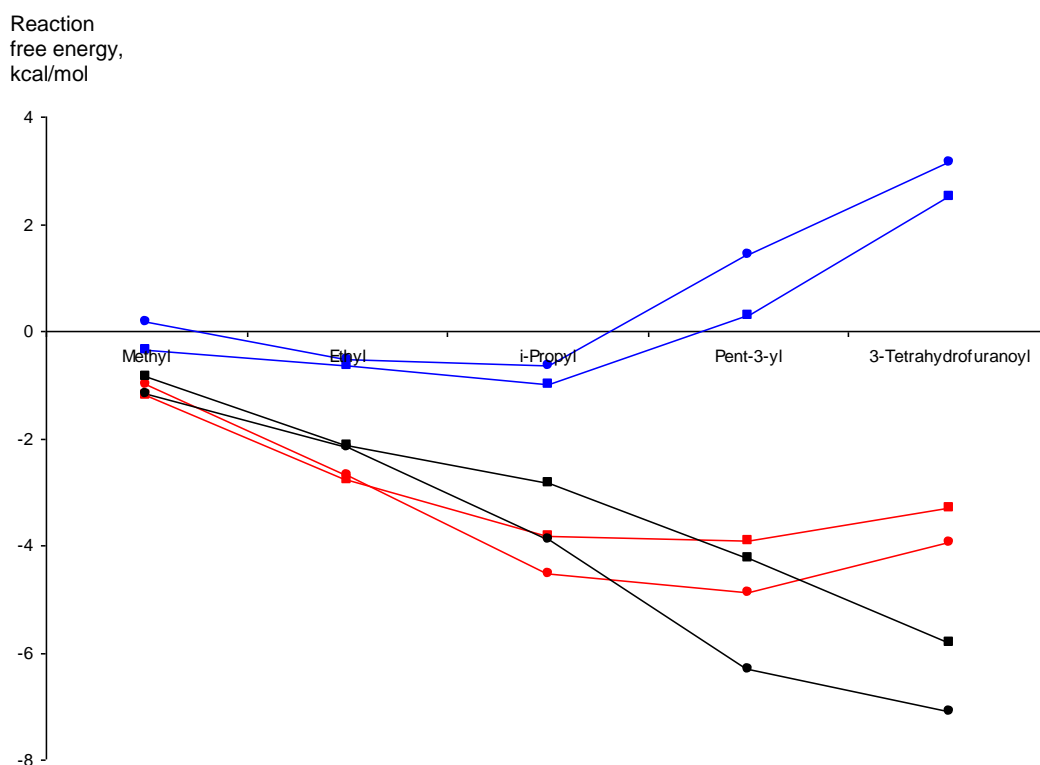

**Figure S1.** Reaction free energies computed at PBE1PBE/6-311++G(2d,2p)//B3LYP/6-311++G(2d,2p) level for the hydrolysis of the studied phosphate- and arsenate-esters. The C-PCM dielectric continuum model was used to account for the effect of aqueous medium. ■: arsenates, ●: phosphates; blue: reaction free energies in gas-phase, red: reaction free energies in solution, black: solvent contribution to the reaction free energies.

We have computed the free energy change for the total hydrolysis reaction according to the following equation:

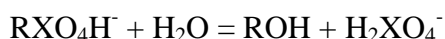

where X=As, P and R=methyl, ethyl, i-propyl, pent-3-yl, 3-tetrahydrofuranoyl.

There are two counteracting effects shaping the reaction free energies in solution (red curves). In gas-phase (blue curves) the hydrolysis products (i.e. alcohols and  $\text{H}_2\text{XO}_4^-$ ) are destabilized as compared to the corresponding esters, most likely because the ester form gains an extra stabilization from the hyperconjugation between the phosphate-/arsenate-moiety and the alkyl group. With the increasing size of the alkyl group this effect becomes more pronounced, due to the extension of the electron delocalization along the alkyl chain, and this leads to the enhancement of the endothermic character of the gas-phase reaction. In contrast, the solvent contribution (black curves) seems to stabilize more the alcohols as compared to the esters, which shifts the reaction free energy changes into the exothermic direction. The steady increase of this exothermic contribution with the size of the alkyl group could be explained by steric effects. The major part of the solvation free energy is carried by the charged monoester anions. The larger is the alkyl group the worse is the ester solvated. Thus, with increasing size of the alkyl group, this leads to an increase of the solvent-related stabilization of the products of the hydrolysis reaction as compared to the reactants.

## Optimized geometries of the computed models obtained at B3LYP/6-311++G(2d,2p) level

### Abbreviations:

Im1: initial state complex, Ts1: transition state of the addition step, Im2: trigonal bipyramidal intermediate, Ts2: transition state of the dissociation step, Im3: primary product of the reaction, see Figure 1 in the paper.

Models used for the hydrolysis of **methyl-arsenate** monoanion:

#### Im1

|    |           |           |           |
|----|-----------|-----------|-----------|
| As | 0.119294  | -0.328571 | 0.036538  |
| O  | -0.560367 | 0.252920  | 1.423982  |
| O  | 1.716762  | 0.489648  | -0.204702 |
| O  | -0.722452 | -0.373278 | -1.391446 |
| O  | 0.795330  | -1.976206 | 0.288695  |
| C  | 1.686128  | 1.909011  | -0.133555 |
| H  | 0.573499  | -2.447857 | -0.522063 |
| H  | -2.452121 | 0.765183  | 0.696225  |
| H  | 2.720564  | 2.254081  | -0.183771 |
| O  | -3.071957 | 0.828487  | -0.049897 |
| H  | -2.524210 | 0.447457  | -0.757308 |
| H  | 1.238334  | 2.254027  | 0.801504  |
| H  | 1.131950  | 2.343334  | -0.972085 |

#### Ts1

|    |           |           |           |
|----|-----------|-----------|-----------|
| As | -0.130533 | 0.049446  | 0.088023  |
| O  | -0.481004 | -0.930640 | -1.295066 |
| O  | 1.608732  | 0.501097  | -0.322333 |
| O  | -0.065301 | -0.558445 | 1.615644  |
| O  | -0.594587 | 1.762825  | -0.134892 |
| C  | 2.584546  | -0.498201 | -0.095696 |
| H  | 0.248289  | 2.204044  | -0.299445 |
| H  | -1.586399 | -0.905025 | -0.955521 |
| H  | 3.566401  | -0.045335 | -0.256081 |
| H  | 2.469793  | -1.335163 | -0.793103 |
| H  | 2.532065  | -0.883527 | 0.926244  |
| O  | -2.425343 | -0.374481 | -0.115434 |
| H  | -2.524939 | -0.960806 | 0.640160  |

#### Im2

|    |           |           |           |
|----|-----------|-----------|-----------|
| As | -0.296937 | 0.041596  | 0.155837  |
| O  | -0.308519 | -0.926149 | -1.375860 |
| O  | 1.484342  | 0.538732  | -0.292495 |
| O  | -0.002147 | -0.643131 | 1.641352  |
| O  | -0.632869 | 1.786395  | -0.126554 |
| C  | 2.497330  | -0.405243 | -0.046577 |
| H  | 0.246933  | 2.147855  | -0.294314 |
| H  | -1.220561 | -1.241153 | -1.406327 |
| H  | 3.466352  | 0.098168  | -0.143094 |

|   |           |           |           |
|---|-----------|-----------|-----------|
| H | 2.469851  | -1.229743 | -0.771651 |
| H | 2.415893  | -0.827721 | 0.959159  |
| O | -2.167765 | -0.227401 | 0.193636  |
| H | -2.272402 | -0.617905 | 1.067589  |

Ts2

|    |           |           |           |
|----|-----------|-----------|-----------|
| As | 0.444053  | 0.090947  | 0.011943  |
| O  | 0.697013  | -1.059317 | -1.341417 |
| O  | -1.811774 | -0.655821 | -0.162046 |
| O  | 0.108736  | 1.657245  | -0.363102 |
| O  | -0.096648 | -0.744378 | 1.422719  |
| C  | -2.793123 | 0.334273  | -0.096276 |
| H  | -1.113916 | -0.861574 | 0.934400  |
| H  | 1.657503  | -1.142978 | -1.380318 |
| H  | -3.799082 | -0.112844 | -0.026657 |
| H  | -2.776061 | 0.973347  | -0.988645 |
| H  | -2.671108 | 1.004890  | 0.768693  |
| O  | 2.238335  | 0.153517  | 0.397911  |
| H  | 2.450397  | 1.088165  | 0.302456  |

Im3

|    |           |           |           |
|----|-----------|-----------|-----------|
| As | -0.758556 | -0.419338 | -0.273288 |
| O  | -0.129081 | 0.933087  | 0.755929  |
| O  | 3.059328  | -0.204836 | -1.266317 |
| O  | -2.034570 | 0.204325  | -1.119671 |
| O  | 0.552301  | -1.208700 | -0.884542 |
| C  | 3.463023  | 0.169360  | 0.032438  |
| H  | 2.145184  | -0.564961 | -1.195246 |
| H  | -0.754706 | 1.651690  | 0.611323  |
| H  | 2.710474  | 0.784608  | 0.535081  |
| H  | 4.386449  | 0.748026  | -0.053523 |
| H  | 3.667655  | -0.700832 | 0.671149  |
| O  | -1.470811 | -1.507982 | 0.983056  |
| H  | -2.416553 | -1.327533 | 0.942188  |

Models used for the hydrolysis of **methyl-phosphate** monoanion:

Im1:

|   |           |           |           |
|---|-----------|-----------|-----------|
| P | -0.188299 | 0.413893  | 0.048986  |
| O | 0.485204  | 0.030203  | 1.325768  |
| O | -1.628135 | -0.393639 | -0.064410 |
| O | 0.532744  | 0.323383  | -1.266350 |
| O | -0.812034 | 1.925684  | 0.186272  |
| C | -1.541372 | -1.809730 | -0.088595 |
| H | -0.784835 | 2.310802  | -0.694198 |
| H | 2.388704  | -0.536877 | 0.721599  |
| H | -2.561200 | -2.195921 | -0.120149 |
| O | 2.987873  | -0.672555 | -0.031274 |
| H | 2.397783  | -0.377595 | -0.745214 |
| H | -1.039440 | -2.187432 | 0.805572  |
| H | -1.000251 | -2.158351 | -0.973104 |

Ts1:

|   |           |          |          |
|---|-----------|----------|----------|
| P | -0.159883 | 0.076785 | 0.099926 |
|---|-----------|----------|----------|

|   |           |           |           |
|---|-----------|-----------|-----------|
| O | -0.377455 | -0.845168 | -1.183423 |
| O | 1.437795  | 0.527429  | -0.258104 |
| O | -0.102214 | -0.495836 | 1.471704  |
| O | -0.670064 | 1.609866  | -0.112697 |
| C | 2.442159  | -0.441545 | -0.036020 |
| H | 0.127449  | 2.130955  | -0.259460 |
| H | -1.408139 | -0.957887 | -0.987287 |
| H | 3.408160  | 0.039092  | -0.206287 |
| H | 2.340509  | -1.282551 | -0.729439 |
| H | 2.399839  | -0.821748 | 0.987366  |
| O | -2.370651 | -0.363665 | -0.055279 |
| H | -2.457364 | -0.897420 | 0.738537  |

Im2:

|   |           |           |           |
|---|-----------|-----------|-----------|
| P | -0.281301 | 0.049579  | 0.125250  |
| O | -0.253924 | -0.825983 | -1.286499 |
| O | 1.399776  | 0.529228  | -0.265348 |
| O | -0.001903 | -0.573510 | 1.470545  |
| O | -0.624021 | 1.646603  | -0.102669 |
| C | 2.417864  | -0.406536 | -0.039113 |
| H | 0.234479  | 2.061082  | -0.249184 |
| H | -1.145092 | -1.188862 | -1.345082 |
| H | 3.382223  | 0.086887  | -0.207166 |
| H | 2.349155  | -1.259272 | -0.728549 |
| H | 2.385531  | -0.791764 | 0.984631  |
| O | -2.035103 | -0.231020 | 0.162794  |
| H | -2.148185 | -0.602133 | 1.041088  |

Ts2:

|   |           |           |           |
|---|-----------|-----------|-----------|
| P | 0.533209  | 0.091477  | 0.017904  |
| O | 0.645714  | -0.944697 | -1.240981 |
| O | -1.617499 | -0.639369 | -0.050017 |
| O | 0.143902  | 1.505377  | -0.232299 |
| O | 0.240333  | -0.679825 | 1.381012  |
| C | -2.609723 | 0.325584  | -0.105111 |
| H | -0.752813 | -0.865212 | 1.171274  |
| H | 1.588749  | -1.017699 | -1.422957 |
| H | -3.611631 | -0.126407 | 0.018645  |
| H | -2.616765 | 0.859204  | -1.070091 |
| H | -2.511455 | 1.107218  | 0.669068  |
| O | 2.212058  | 0.191099  | 0.233562  |
| H | 2.397243  | 1.133163  | 0.197673  |

Im3:

|   |           |           |           |
|---|-----------|-----------|-----------|
| P | 1.007684  | -0.059408 | -0.124657 |
| O | 1.926606  | -0.869176 | -1.237400 |
| O | -2.683882 | -0.970040 | 0.036673  |
| O | 0.664808  | 1.271725  | -0.723172 |
| O | 0.010953  | -1.030826 | 0.412490  |
| C | -2.971456 | 0.411481  | 0.087367  |
| H | -1.712489 | -1.064853 | 0.167722  |
| H | 2.129487  | -0.231325 | -1.927099 |
| H | -3.040468 | 0.781604  | 1.120390  |
| H | -3.939611 | 0.578923  | -0.393225 |
| H | -2.212931 | 1.005020  | -0.430352 |

|   |          |          |          |
|---|----------|----------|----------|
| O | 2.102124 | 0.211400 | 1.085550 |
| H | 2.400978 | 1.118275 | 0.976212 |

Models used for the hydrolysis of **ethyl-arsenate** monoanion:

Im1:

|    |           |           |           |
|----|-----------|-----------|-----------|
| As | 0.115091  | -0.347125 | 0.012510  |
| O  | -0.552187 | 0.217924  | 1.412670  |
| O  | 1.708404  | 0.478065  | -0.233072 |
| O  | -0.739257 | -0.377751 | -1.408377 |
| O  | 0.796410  | -1.996150 | 0.240238  |
| C  | 1.689555  | 1.900094  | -0.135233 |
| H  | 0.565270  | -2.460988 | -0.571860 |
| H  | -2.441859 | 0.780129  | 0.686101  |
| C  | 3.125829  | 2.396394  | -0.152775 |
| O  | -3.051736 | 0.867574  | -0.065370 |
| H  | -2.506471 | 0.479223  | -0.771214 |
| H  | 1.188444  | 2.206321  | 0.786971  |
| H  | 1.133654  | 2.329227  | -0.976725 |
| H  | 3.153691  | 3.487195  | -0.091031 |
| H  | 3.627467  | 2.089128  | -1.071464 |
| H  | 3.681095  | 1.986441  | 0.691632  |

Ts1

|    |           |           |           |
|----|-----------|-----------|-----------|
| As | -0.491828 | 0.044408  | 0.099817  |
| O  | -0.801187 | -0.902963 | -1.315232 |
| O  | 1.275488  | 0.458797  | -0.224347 |
| O  | -0.509413 | -0.588854 | 1.618343  |
| O  | -0.904310 | 1.772196  | -0.112630 |
| C  | 2.224040  | -0.568937 | 0.009619  |
| H  | -0.045528 | 2.195298  | -0.237479 |
| H  | -1.921028 | -0.856313 | -1.024488 |
| C  | 3.621502  | 0.016348  | -0.127253 |
| H  | 2.085825  | -1.379861 | -0.715345 |
| H  | 2.082437  | -0.989406 | 1.009913  |
| O  | -2.781887 | -0.320228 | -0.212751 |
| H  | -2.929140 | -0.917101 | 0.526626  |
| H  | 4.379056  | -0.753999 | 0.039297  |
| H  | 3.774402  | 0.814167  | 0.601228  |
| H  | 3.767582  | 0.433820  | -1.124836 |

Im2:

|    |           |           |           |
|----|-----------|-----------|-----------|
| As | -0.592157 | 0.032437  | 0.135457  |
| O  | -0.613205 | -0.907167 | -1.413149 |
| O  | 1.228097  | 0.436908  | -0.258707 |
| O  | -0.371073 | -0.690607 | 1.615271  |
| O  | -0.823901 | 1.796433  | -0.126649 |
| C  | 2.187935  | -0.566138 | -0.025842 |
| H  | 0.077316  | 2.111860  | -0.271573 |
| H  | -1.538960 | -1.173683 | -1.474871 |
| C  | 3.581187  | 0.047948  | -0.106417 |
| H  | 2.097203  | -1.365480 | -0.774894 |
| H  | 2.029722  | -1.018984 | 0.958005  |

|   |           |           |           |
|---|-----------|-----------|-----------|
| O | -2.473791 | -0.134559 | 0.122937  |
| H | -2.620716 | -0.539644 | 0.984103  |
| H | 4.351090  | -0.711173 | 0.061192  |
| H | 3.696455  | 0.828993  | 0.647443  |
| H | 3.748300  | 0.497356  | -1.087502 |

Ts2:

|    |           |           |           |
|----|-----------|-----------|-----------|
| As | 0.598201  | 0.139183  | -0.018166 |
| O  | 0.820748  | -1.077374 | -1.315652 |
| O  | -1.678095 | -0.655882 | -0.080191 |
| O  | 0.223421  | 1.675697  | -0.465624 |
| O  | 0.101967  | -0.629260 | 1.445278  |
| C  | -2.680662 | 0.311445  | -0.035066 |
| H  | -0.920244 | -0.787064 | 1.005214  |
| H  | 1.780016  | -1.160419 | -1.378645 |
| C  | -4.068457 | -0.330212 | 0.069376  |
| H  | -2.644189 | 0.939635  | -0.936337 |
| H  | -2.546459 | 1.003211  | 0.813626  |
| O  | 2.397593  | 0.240638  | 0.317315  |
| H  | 2.599276  | 1.170565  | 0.168141  |
| H  | -4.858310 | 0.429102  | 0.086945  |
| H  | -4.145265 | -0.928890 | 0.980008  |
| H  | -4.241742 | -0.992976 | -0.781020 |

Im3:

|    |           |           |           |
|----|-----------|-----------|-----------|
| As | 0.816507  | 0.019308  | -0.074454 |
| O  | 2.047356  | 0.615754  | -1.255707 |
| O  | -2.697537 | -1.740596 | -0.398567 |
| O  | 0.213685  | 1.355506  | 0.694037  |
| O  | -0.062345 | -1.137090 | -0.852387 |
| C  | -3.393789 | -0.537991 | -0.659118 |
| H  | -1.734827 | -1.562753 | -0.505074 |
| H  | 2.170147  | 1.542775  | -1.022750 |
| C  | -3.366044 | 0.439080  | 0.514830  |
| H  | -4.428435 | -0.816900 | -0.885142 |
| H  | -2.988740 | -0.046340 | -1.552032 |
| O  | 1.876334  | -0.816323 | 1.129369  |
| H  | 1.892107  | -0.216475 | 1.883551  |
| H  | -3.970910 | 1.324332  | 0.291747  |
| H  | -2.346944 | 0.766677  | 0.724028  |
| H  | -3.771066 | -0.037562 | 1.410071  |

Models used for the hydrolysis of **ethyl-phosphate** monoanion:

Im1:

|   |           |           |           |
|---|-----------|-----------|-----------|
| P | 0.157519  | -0.306359 | 0.050884  |
| O | -0.508418 | 0.126034  | 1.315795  |
| O | 1.637524  | 0.427316  | -0.057447 |
| O | -0.543909 | -0.195762 | -1.273481 |
| O | 0.702379  | -1.845910 | 0.213228  |
| C | 1.632138  | 1.849110  | -0.106300 |
| H | 0.652344  | -2.244958 | -0.659987 |
| H | -2.407827 | 0.713275  | 0.690459  |
| C | 3.070124  | 2.333503  | -0.180668 |

|   |           |          |           |
|---|-----------|----------|-----------|
| O | -2.997942 | 0.845081 | -0.069995 |
| H | -2.404104 | 0.535439 | -0.774581 |
| H | 1.136231  | 2.245175 | 0.784454  |
| H | 1.068641  | 2.187936 | -0.981701 |
| H | 3.104328  | 3.425066 | -0.217967 |
| H | 3.562181  | 1.941664 | -1.072116 |
| H | 3.632192  | 1.999090 | 0.692422  |

Ts1:

|   |           |           |           |
|---|-----------|-----------|-----------|
| P | -0.586781 | 0.065179  | 0.110883  |
| O | -0.794224 | -0.814470 | -1.203089 |
| O | 1.041373  | 0.457455  | -0.178345 |
| O | -0.602176 | -0.541678 | 1.468945  |
| O | -1.026412 | 1.622780  | -0.079359 |
| C | 2.007469  | -0.553234 | 0.046659  |
| H | -0.204398 | 2.114112  | -0.188287 |
| H | -1.836139 | -0.888869 | -1.045553 |
| C | 3.394220  | 0.055174  | -0.092869 |
| H | 1.874788  | -1.361768 | -0.680960 |
| H | 1.868943  | -0.977350 | 1.044737  |
| O | -2.805362 | -0.280121 | -0.134407 |
| H | -2.942727 | -0.830295 | 0.640832  |
| H | 4.164182  | -0.703491 | 0.068910  |
| H | 3.537621  | 0.852640  | 0.638171  |
| H | 3.532222  | 0.478812  | -1.089137 |

Im2:

|   |           |           |           |
|---|-----------|-----------|-----------|
| P | -0.708104 | 0.038700  | 0.132907  |
| O | -0.652364 | -0.786742 | -1.307420 |
| O | 1.015999  | 0.449571  | -0.165433 |
| O | -0.517974 | -0.641884 | 1.465365  |
| O | -0.962065 | 1.656865  | -0.051831 |
| C | 1.986730  | -0.534532 | 0.067617  |
| H | -0.079347 | 2.034117  | -0.144437 |
| H | -1.555504 | -1.103731 | -1.422310 |
| C | 3.372801  | 0.076115  | -0.110522 |
| H | 1.863456  | -1.371106 | -0.635016 |
| H | 1.876055  | -0.942006 | 1.077941  |
| O | -2.470411 | -0.158072 | 0.081043  |
| H | -2.642593 | -0.554742 | 0.938380  |
| H | 4.153414  | -0.671279 | 0.060942  |
| H | 3.521361  | 0.896727  | 0.594611  |
| H | 3.492645  | 0.474199  | -1.120439 |

Ts2:

|   |           |           |           |
|---|-----------|-----------|-----------|
| P | 0.545389  | 0.096059  | 0.019039  |
| O | 0.630630  | -0.948406 | -1.233343 |
| O | -1.614644 | -0.631785 | -0.009989 |
| O | 0.150239  | 1.507637  | -0.229994 |
| O | 0.277633  | -0.666727 | 1.393419  |
| C | -2.611873 | 0.323183  | -0.086361 |
| H | -0.713231 | -0.854924 | 1.220027  |
| H | 1.569283  | -1.023817 | -1.436101 |
| C | -4.004074 | -0.312970 | 0.029867  |
| H | -2.559679 | 0.873918  | -1.041199 |



|   |           |           |           |
|---|-----------|-----------|-----------|
| H | -2.518260 | 1.098163  | 0.697147  |
| O | 2.225766  | 0.192742  | 0.204540  |
| H | 2.414173  | 1.134130  | 0.167464  |
| H | -4.797231 | 0.440688  | -0.044128 |
| H | -4.107380 | -0.829751 | 0.987594  |
| H | -4.148940 | -1.050740 | -0.762780 |

Im3:

|   |           |           |           |
|---|-----------|-----------|-----------|
| P | 0.788854  | -0.006730 | -0.053477 |
| O | 1.870159  | 0.517033  | -1.188577 |
| O | -2.651973 | -1.719655 | -0.463236 |
| O | 0.192679  | 1.207586  | 0.593974  |
| O | -0.002622 | -1.097724 | -0.692031 |
| C | -3.336696 | -0.502765 | -0.680467 |
| H | -1.685187 | -1.533166 | -0.498471 |
| H | 2.017843  | 1.449506  | -1.008384 |
| C | -3.318464 | 0.422557  | 0.534837  |
| H | -4.369350 | -0.765381 | -0.934166 |
| H | -2.915781 | 0.026674  | -1.544532 |
| O | 1.784098  | -0.711636 | 1.064224  |
| H | 1.832319  | -0.097227 | 1.801645  |
| H | -3.911618 | 1.322783  | 0.341091  |
| H | -2.297618 | 0.727767  | 0.767049  |
| H | -3.741144 | -0.088221 | 1.402924  |

Models used for the hydrolysis of **i-propyl-arsenate** monoanion:

Im1:

|    |           |           |           |
|----|-----------|-----------|-----------|
| As | 0.027850  | 0.680799  | -0.363425 |
| O  | -0.718455 | -0.376637 | -1.388113 |
| O  | 1.818283  | 0.588757  | -0.612544 |
| O  | -0.303707 | 0.688458  | 1.261520  |
| O  | -0.153345 | 2.369288  | -0.952982 |
| C  | 2.429790  | -0.687392 | -0.379126 |
| H  | -0.249274 | 2.894796  | -0.150774 |
| H  | -1.937942 | -1.398630 | -0.001268 |
| C  | 3.813752  | -0.418708 | 0.202278  |
| C  | 2.481172  | -1.493380 | -1.674819 |
| H  | 1.847403  | -1.244124 | 0.362770  |
| O  | -2.210929 | -1.529149 | 0.921891  |
| H  | -1.685282 | -0.833404 | 1.353496  |
| H  | 4.339391  | -1.354895 | 0.404721  |
| H  | 3.729365  | 0.144118  | 1.131335  |
| H  | 4.408116  | 0.167208  | -0.501837 |
| H  | 2.932759  | -2.474514 | -1.504279 |
| H  | 3.075300  | -0.961635 | -2.421467 |
| H  | 1.472651  | -1.626457 | -2.062577 |

Ts1:

|    |           |           |           |
|----|-----------|-----------|-----------|
| As | -0.177730 | 0.047551  | 0.044565  |
| O  | -0.804888 | -0.976117 | -1.201831 |
| O  | 1.520605  | 0.322408  | -0.624150 |
| O  | 0.062695  | -0.472747 | 1.587784  |
| O  | -0.538864 | 1.775529  | -0.241616 |

|   |           |           |           |
|---|-----------|-----------|-----------|
| C | 2.545858  | -0.600661 | -0.265179 |
| H | 0.310522  | 2.132451  | -0.530709 |
| H | -1.843640 | -0.830646 | -0.712221 |
| C | 3.850992  | 0.182149  | -0.148872 |
| C | 2.635025  | -1.722769 | -1.299953 |
| H | 2.304876  | -1.029317 | 0.711881  |
| O | -2.500192 | -0.180010 | 0.200994  |
| H | -2.538542 | -0.712728 | 1.000573  |
| H | 4.678754  | -0.475873 | 0.127257  |
| H | 3.757239  | 0.959136  | 0.609924  |
| H | 4.093050  | 0.659380  | -1.101388 |
| H | 3.395636  | -2.456012 | -1.016984 |
| H | 2.892824  | -1.313524 | -2.279557 |
| H | 1.673577  | -2.226496 | -1.388818 |

Im2:

|    |           |           |           |
|----|-----------|-----------|-----------|
| As | -0.271398 | 0.062598  | 0.128039  |
| O  | -0.644212 | -1.067882 | -1.236232 |
| O  | 1.463354  | 0.274759  | -0.644942 |
| O  | 0.193429  | -0.476868 | 1.630191  |
| O  | -0.462317 | 1.784742  | -0.348876 |
| C  | 2.496443  | -0.627736 | -0.301651 |
| H  | 0.413543  | 2.005553  | -0.691728 |
| H  | -1.581127 | -1.252997 | -1.092174 |
| C  | 3.780127  | 0.173941  | -0.077505 |
| C  | 2.672433  | -1.682574 | -1.398847 |
| H  | 2.234366  | -1.124911 | 0.636833  |
| O  | -2.124689 | 0.044030  | 0.490032  |
| H  | -2.124955 | -0.227692 | 1.413759  |
| H  | 4.615748  | -0.479727 | 0.188951  |
| H  | 3.632291  | 0.894464  | 0.727133  |
| H  | 4.047531  | 0.722239  | -0.984826 |
| H  | 3.449626  | -2.405867 | -1.132318 |
| H  | 2.952607  | -1.204542 | -2.341353 |
| H  | 1.734105  | -2.212131 | -1.555888 |

Ts2:

|    |           |           |           |
|----|-----------|-----------|-----------|
| As | 0.519806  | 0.061638  | 0.095593  |
| O  | 0.856547  | -0.837567 | -1.416320 |
| O  | -1.766633 | -0.558884 | -0.407159 |
| O  | 0.253675  | 1.679966  | -0.018532 |
| O  | -0.182424 | -0.985540 | 1.273501  |
| C  | -2.758962 | 0.414124  | -0.264057 |
| H  | -1.146057 | -0.976608 | 0.705894  |
| H  | 1.811887  | -0.970696 | -1.388780 |
| C  | -4.098371 | -0.248110 | 0.094979  |
| C  | -2.877381 | 1.240792  | -1.549048 |
| H  | -2.504444 | 1.115050  | 0.548681  |
| O  | 2.262839  | -0.028034 | 0.648992  |
| H  | 2.514798  | 0.896670  | 0.744552  |
| H  | -3.648884 | 2.013199  | -1.462490 |
| H  | -3.129210 | 0.586919  | -2.388356 |
| H  | -1.922564 | 1.721909  | -1.755064 |
| H  | -4.892420 | 0.493158  | 0.232951  |
| H  | -3.999302 | -0.822393 | 1.017993  |

H -4.397500 -0.936791 -0.699229

Im3:

As 1.195950 -0.167036 0.259860  
O 2.678630 0.575159 -0.458849  
O -2.410004 -0.982989 -1.194179  
O 0.666427 0.876144 1.430780  
O 0.303907 -0.752814 -0.995439  
C -2.914255 0.338624 -1.102508  
H -1.432914 -0.949197 -1.069124  
H 2.885370 1.309361 0.130147  
C -2.894434 0.851224 0.339382  
C -4.323606 0.326604 -1.686850  
H -2.291542 1.007397 -1.711930  
O 1.909691 -1.582642 1.129109  
H 1.894960 -1.321044 2.056552  
H -3.286254 1.871403 0.397306  
H -1.879281 0.854472 0.736963  
H -3.512253 0.207243 0.970521  
H -4.770303 1.323007 -1.661281  
H -4.959080 -0.351838 -1.112945  
H -4.303607 -0.022279 -2.720014

Models used for the hydrolysis of **i-propyl-phosphate** monoanion:

Im1:

P 0.083048 0.693788 -0.385781  
O -0.630535 -0.248337 -1.300404  
O 1.712267 0.587789 -0.651105  
O -0.174380 0.672586 1.094910  
O -0.115021 2.231457 -0.921461  
C 2.333711 -0.676098 -0.387342  
H -0.080518 2.798511 -0.145855  
H -1.796759 -1.396583 -0.004734  
C 3.696561 -0.392294 0.233997  
C 2.428804 -1.485898 -1.677460  
H 1.728831 -1.228713 0.337293  
O -2.026824 -1.566496 0.923539  
H -1.504826 -0.858383 1.338153  
H 4.224318 -1.322955 0.455399  
H 3.577905 0.171623 1.158730  
H 4.307636 0.197266 -0.452922  
H 2.874957 -2.466108 -1.488750  
H 3.045670 -0.957595 -2.408229  
H 1.432055 -1.619059 -2.093177

Ts1:

P -0.206388 0.135661 -0.087601  
O -1.329971 1.261106 -0.217486  
O 1.121341 1.191461 0.031728  
O 0.123730 -0.770712 -1.220844  
O 0.020177 -0.367314 1.445361  
C 1.694150 1.730831 -1.155635  
H 0.836591 0.054199 1.736944

|   |           |           |           |
|---|-----------|-----------|-----------|
| H | -2.112191 | 0.558451  | -0.124046 |
| C | 3.210816  | 1.729824  | -0.984187 |
| C | 1.143290  | 3.132476  | -1.417788 |
| H | 1.435397  | 1.074725  | -1.989926 |
| O | -2.206554 | -0.866344 | 0.203036  |
| H | -2.207189 | -1.405003 | -0.592171 |
| H | 3.704840  | 2.139406  | -1.868785 |
| H | 3.569379  | 0.713008  | -0.824908 |
| H | 3.495725  | 2.335131  | -0.120138 |
| H | 1.554753  | 3.545188  | -2.343277 |
| H | 1.403486  | 3.802007  | -0.594296 |
| H | 0.058418  | 3.095597  | -1.495480 |

Im2:

|   |           |           |           |
|---|-----------|-----------|-----------|
| P | 0.914410  | -0.244764 | 0.053351  |
| O | 1.000045  | 1.414946  | 0.072684  |
| O | -0.718526 | -0.037539 | -0.672114 |
| O | 0.490099  | -1.038910 | 1.264458  |
| O | 1.303670  | -0.906920 | -1.404033 |
| C | -1.796995 | 0.315955  | 0.163761  |
| H | 0.470835  | -0.935409 | -1.890001 |
| H | 1.884905  | 1.592086  | 0.412378  |
| C | -2.661403 | -0.912066 | 0.461345  |
| C | -2.595240 | 1.431932  | -0.514706 |
| H | -1.413695 | 0.693219  | 1.116143  |
| O | 2.645657  | -0.257644 | 0.427260  |
| H | 2.668603  | -0.814415 | 1.209244  |
| H | -3.501148 | -0.661584 | 1.117942  |
| H | -2.041863 | -1.665603 | 0.943675  |
| H | -3.062469 | -1.323906 | -0.469302 |
| H | -3.440608 | 1.750776  | 0.102850  |
| H | -2.983653 | 1.087513  | -1.476906 |
| H | -1.947525 | 2.289436  | -0.696329 |

Ts2:

|   |           |           |           |
|---|-----------|-----------|-----------|
| P | 0.564171  | 0.074806  | 0.100306  |
| O | 0.742300  | -0.690493 | -1.330256 |
| O | -1.592715 | -0.578299 | -0.241199 |
| O | 0.198489  | 1.516469  | 0.119502  |
| O | 0.186950  | -0.948378 | 1.264308  |
| C | -2.596196 | 0.377562  | -0.249387 |
| H | -0.788455 | -1.073027 | 0.997494  |
| H | 1.693716  | -0.754327 | -1.467655 |
| C | -3.924049 | -0.241017 | 0.221906  |
| C | -2.752728 | 0.991533  | -1.650749 |
| H | -2.355418 | 1.209813  | 0.434819  |
| O | 2.223173  | 0.095279  | 0.432103  |
| H | 2.420005  | 1.020687  | 0.599210  |
| H | -3.531284 | 1.762835  | -1.675382 |
| H | -3.009155 | 0.209885  | -2.371677 |
| H | -1.806925 | 1.440322  | -1.950798 |
| H | -4.735542 | 0.495031  | 0.237984  |
| H | -3.809737 | -0.650430 | 1.227816  |
| H | -4.209801 | -1.060654 | -0.443248 |

Im3:

|   |           |           |           |
|---|-----------|-----------|-----------|
| P | 1.163211  | -0.157023 | 0.253184  |
| O | 2.519870  | 0.469277  | -0.451869 |
| O | -2.352880 | -0.965241 | -1.230042 |
| O | 0.680971  | 0.836619  | 1.267446  |
| O | 0.326930  | -0.706326 | -0.853152 |
| C | -2.874825 | 0.345058  | -1.096617 |
| H | -1.382591 | -0.927206 | -1.058495 |
| H | 2.799244  | 1.201106  | 0.105038  |
| C | -2.856848 | 0.814188  | 0.359890  |
| C | -4.284976 | 0.331419  | -1.679044 |
| H | -2.263167 | 1.042152  | -1.685879 |
| O | 1.778147  | -1.443860 | 1.090788  |
| H | 1.786672  | -1.179538 | 2.014734  |
| H | -3.261278 | 1.827370  | 0.449205  |
| H | -1.838746 | 0.817029  | 0.749422  |
| H | -3.464773 | 0.143706  | 0.973066  |
| H | -4.743790 | 1.321269  | -1.625828 |
| H | -4.910989 | -0.370258 | -1.122848 |
| H | -4.262781 | 0.011059  | -2.721500 |

Models used for the hydrolysis of **pent-3-yl-arsenate** monoanion:

Im1:

|    |           |           |           |
|----|-----------|-----------|-----------|
| As | -0.095133 | 0.733908  | -0.360272 |
| O  | -0.961767 | 0.078759  | -1.599643 |
| O  | 1.669027  | 0.725160  | -0.778652 |
| O  | -0.253997 | 0.209500  | 1.205732  |
| O  | -0.304395 | 2.519530  | -0.384307 |
| C  | 2.438813  | -0.411549 | -0.370851 |
| H  | -0.146451 | 2.804302  | 0.522671  |
| H  | -1.917517 | -1.478728 | -0.538644 |
| C  | 3.889055  | 0.062903  | -0.193468 |
| C  | 2.231173  | -1.622085 | -1.307549 |
| H  | 2.099883  | -0.720557 | 0.622746  |
| O  | -2.046956 | -1.952419 | 0.299646  |
| H  | -1.528002 | -1.388092 | 0.898100  |
| H  | 4.476861  | -0.781604 | 0.180426  |
| H  | 3.873939  | 0.808477  | 0.605137  |
| C  | 4.575348  | 0.673064  | -1.418894 |
| H  | 3.023772  | -2.349328 | -1.099349 |
| C  | 2.151015  | -1.327657 | -2.808511 |
| H  | 1.295070  | -2.102032 | -1.014664 |
| H  | 5.527743  | 1.127786  | -1.136222 |
| H  | 3.948521  | 1.446008  | -1.861592 |
| H  | 4.785006  | -0.072662 | -2.185574 |
| H  | 1.949476  | -2.250698 | -3.356987 |
| H  | 3.070891  | -0.900093 | -3.206257 |
| H  | 1.334924  | -0.635993 | -3.008123 |

Ts1:

|    |           |           |           |
|----|-----------|-----------|-----------|
| As | -0.187102 | 0.066772  | 0.033322  |
| O  | -0.867520 | -0.862008 | -1.257988 |
| O  | 1.491424  | 0.353277  | -0.681331 |

|   |           |           |           |
|---|-----------|-----------|-----------|
| O | 0.098322  | -0.550099 | 1.532500  |
| O | -0.530151 | 1.814558  | -0.131940 |
| C | 2.537093  | -0.556168 | -0.350861 |
| H | 0.315912  | 2.178495  | -0.421439 |
| H | -1.889947 | -0.734428 | -0.723857 |
| C | 3.846723  | 0.241360  | -0.237840 |
| C | 2.558777  | -1.765408 | -1.312131 |
| H | 2.342878  | -0.955098 | 0.649094  |
| O | -2.498915 | -0.138141 | 0.252225  |
| H | -2.522031 | -0.723076 | 1.015056  |
| H | 4.640091  | -0.448067 | 0.069233  |
| H | 3.707629  | 0.940688  | 0.590240  |
| C | 4.294992  | 1.028889  | -1.472812 |
| H | 3.491527  | -2.317130 | -1.148689 |
| C | 2.363449  | -1.464289 | -2.800938 |
| H | 1.749559  | -2.429622 | -1.002130 |
| H | 5.124464  | 1.694968  | -1.223209 |
| H | 3.476878  | 1.637111  | -1.857239 |
| H | 4.632539  | 0.374851  | -2.276525 |
| H | 2.286695  | -2.396530 | -3.365619 |
| H | 3.183610  | -0.887148 | -3.227902 |
| H | 1.439402  | -0.907858 | -2.944320 |

Im2:

|    |           |           |           |
|----|-----------|-----------|-----------|
| As | -0.426798 | 0.049194  | 0.125664  |
| O  | -0.684414 | -0.995428 | -1.329335 |
| O  | 1.309195  | 0.428616  | -0.588877 |
| O  | 0.042231  | -0.557808 | 1.599564  |
| O  | -0.726265 | 1.783906  | -0.235079 |
| C  | 2.412217  | -0.370908 | -0.213582 |
| H  | 0.141809  | 2.088992  | -0.529073 |
| H  | -1.610674 | -1.251554 | -1.233453 |
| C  | 3.629460  | 0.544183  | 0.026899  |
| C  | 2.636028  | -1.535395 | -1.207064 |
| H  | 2.194670  | -0.830306 | 0.755229  |
| O  | -2.280390 | -0.124179 | 0.430669  |
| H  | -2.286786 | -0.459163 | 1.333252  |
| H  | 3.591618  | -2.018266 | -0.969860 |
| C  | 2.564906  | -1.190636 | -2.697634 |
| H  | 1.856991  | -2.272368 | -1.002758 |
| H  | 4.476235  | -0.077822 | 0.337851  |
| H  | 3.371800  | 1.167802  | 0.886638  |
| C  | 4.054079  | 1.459183  | -1.126025 |
| H  | 2.588280  | -2.102179 | -3.300819 |
| H  | 3.391028  | -0.559561 | -3.026403 |
| H  | 1.632272  | -0.670335 | -2.907475 |
| H  | 4.783203  | 2.198750  | -0.784550 |
| H  | 3.191472  | 1.992986  | -1.523919 |
| H  | 4.512036  | 0.905495  | -1.945763 |

Ts2:

|    |           |           |           |
|----|-----------|-----------|-----------|
| As | 0.531750  | 0.035107  | 0.124477  |
| O  | 0.926049  | -0.756819 | -1.432118 |
| O  | -1.742707 | -0.578706 | -0.514653 |
| O  | 0.248177  | 1.653459  | 0.108400  |

|   |           |           |           |
|---|-----------|-----------|-----------|
| O | -0.211837 | -1.092275 | 1.197658  |
| C | -2.745998 | 0.379210  | -0.365457 |
| H | -1.150065 | -1.053743 | 0.602049  |
| H | 1.882297  | -0.879014 | -1.388921 |
| C | -4.095316 | -0.291384 | -0.005718 |
| C | -2.788718 | 1.327335  | -1.589216 |
| H | -2.524168 | 1.041189  | 0.489192  |
| O | 2.249817  | -0.083102 | 0.737521  |
| H | 2.489747  | 0.832313  | 0.916963  |
| H | -3.677868 | 1.965992  | -1.519336 |
| C | -2.717567 | 0.656130  | -2.964772 |
| H | -1.921018 | 1.980979  | -1.486013 |
| H | -4.859365 | 0.486420  | 0.110815  |
| H | -3.960675 | -0.740768 | 0.982945  |
| C | -4.592572 | -1.379384 | -0.962403 |
| H | -2.558316 | 1.402694  | -3.747810 |
| H | -3.625859 | 0.106938  | -3.216381 |
| H | -1.884726 | -0.045294 | -2.985114 |
| H | -5.418930 | -1.942520 | -0.519890 |
| H | -3.783333 | -2.074287 | -1.185282 |
| H | -4.948898 | -0.965069 | -1.905938 |

Im3:

|    |           |           |           |
|----|-----------|-----------|-----------|
| As | 1.541846  | -0.347201 | 0.306853  |
| O  | 1.758336  | -1.135493 | 1.918226  |
| O  | -1.676171 | -0.296111 | -1.961760 |
| O  | 3.054485  | 0.047229  | -0.228724 |
| O  | 0.400352  | -1.233137 | -0.488394 |
| C  | -2.500857 | 0.309987  | -0.980124 |
| H  | -0.872986 | -0.634923 | -1.499226 |
| H  | 2.683866  | -0.980249 | 2.137320  |
| C  | -3.167966 | -0.741061 | -0.068848 |
| C  | -3.448979 | 1.295747  | -1.686259 |
| H  | -1.873653 | 0.912664  | -0.313318 |
| O  | 0.750843  | 1.210304  | 0.786062  |
| H  | 1.441402  | 1.873668  | 0.677284  |
| H  | -3.745549 | -0.216389 | 0.700636  |
| H  | -2.350650 | -1.246676 | 0.449027  |
| C  | -4.040849 | -1.797360 | -0.752622 |
| H  | -4.190071 | 1.649082  | -0.962126 |
| C  | -4.145792 | 0.787093  | -2.953375 |
| H  | -2.849601 | 2.167139  | -1.962745 |
| H  | -4.671626 | 1.604578  | -3.453174 |
| H  | -4.875109 | 0.005368  | -2.745548 |
| H  | -3.410285 | 0.379444  | -3.644969 |
| H  | -4.275949 | -2.608114 | -0.059302 |
| H  | -3.515874 | -2.227057 | -1.605483 |
| H  | -4.988267 | -1.389028 | -1.107711 |

Models used for the hydrolysis of **pent-3-yl-phosphate** monoanion:

Im1:

|   |          |           |           |
|---|----------|-----------|-----------|
| P | 0.676631 | -0.494093 | -0.617460 |
| O | 1.074232 | 0.773527  | -1.297831 |

|   |           |           |           |
|---|-----------|-----------|-----------|
| O | -0.952865 | -0.735322 | -0.789663 |
| O | 1.043759  | -0.760029 | 0.815214  |
| O | 1.179843  | -1.751854 | -1.543099 |
| C | -1.839882 | -0.110412 | 0.142707  |
| H | 1.234776  | -2.522260 | -0.970410 |
| H | 2.114158  | 1.813299  | 0.181362  |
| C | -3.103519 | -0.978954 | 0.224266  |
| C | -2.060710 | 1.383422  | -0.177921 |
| H | -1.375612 | -0.157147 | 1.131902  |
| O | 2.398802  | 1.817176  | 1.110115  |
| H | 2.075227  | 0.938764  | 1.371033  |
| H | -3.762405 | -0.545288 | 0.983262  |
| H | -2.784870 | -1.950813 | 0.609050  |
| C | -3.881977 | -1.199566 | -1.075794 |
| H | -2.918669 | 1.729906  | 0.409194  |
| C | -2.231659 | 1.752538  | -1.654359 |
| H | -1.190203 | 1.923791  | 0.196814  |
| H | -4.650703 | -1.963440 | -0.935891 |
| H | -3.213888 | -1.532316 | -1.869254 |
| H | -4.381830 | -0.292052 | -1.413822 |
| H | -2.320697 | 2.836608  | -1.758024 |
| H | -3.116290 | 1.303675  | -2.105412 |
| H | -1.355551 | 1.432841  | -2.214777 |

Ts1:

|   |           |           |           |
|---|-----------|-----------|-----------|
| P | 0.765157  | -0.110546 | -0.024384 |
| O | 0.904134  | 1.309778  | -0.735458 |
| O | -0.824498 | -0.432255 | -0.543383 |
| O | 0.719420  | -0.248057 | 1.456655  |
| O | 1.344873  | -1.331740 | -0.934604 |
| C | -1.926224 | -0.004758 | 0.250631  |
| H | 0.568280  | -1.782919 | -1.284079 |
| H | 1.936953  | 1.370379  | -0.515903 |
| C | -3.025205 | -1.075765 | 0.159991  |
| C | -2.352622 | 1.437928  | -0.097322 |
| H | -1.600948 | 0.006996  | 1.293742  |
| O | 2.941685  | 0.467053  | 0.037381  |
| H | 3.030298  | 0.584381  | 0.986509  |
| H | -3.852656 | -0.769961 | 0.808521  |
| H | -2.604901 | -1.982142 | 0.602751  |
| C | -3.560246 | -1.416439 | -1.234312 |
| H | -3.306304 | 1.641355  | 0.403044  |
| C | -2.438783 | 1.793355  | -1.584414 |
| H | -1.615295 | 2.101230  | 0.357430  |
| H | -4.192779 | -2.306687 | -1.195889 |
| H | -2.739295 | -1.615253 | -1.922545 |
| H | -4.159456 | -0.608454 | -1.653292 |
| H | -2.625572 | 2.863245  | -1.704906 |
| H | -3.235756 | 1.260741  | -2.103403 |
| H | -1.494161 | 1.560535  | -2.071561 |

Im2:

|   |           |           |           |
|---|-----------|-----------|-----------|
| P | -0.388079 | 0.071822  | 0.086151  |
| O | -0.579138 | -0.951518 | -1.206413 |
| O | 1.266977  | 0.411850  | -0.577971 |



|   |           |           |           |
|---|-----------|-----------|-----------|
| O | 0.047253  | -0.408720 | 1.447201  |
| O | -0.683525 | 1.646459  | -0.293055 |
| C | 2.368581  | -0.381714 | -0.207881 |
| H | 0.170559  | 1.986891  | -0.585245 |
| H | -1.492541 | -1.250780 | -1.125729 |
| C | 3.584025  | 0.535068  | 0.040205  |
| C | 2.607410  | -1.542819 | -1.204178 |
| H | 2.148840  | -0.845030 | 0.758088  |
| O | -2.124578 | -0.100174 | 0.377284  |
| H | -2.143811 | -0.363929 | 1.300214  |
| H | 3.567894  | -2.016207 | -0.966354 |
| C | 2.537581  | -1.193192 | -2.693708 |
| H | 1.835147  | -2.287583 | -1.004571 |
| H | 4.433077  | -0.084996 | 0.349462  |
| H | 3.321593  | 1.153628  | 0.902233  |
| C | 4.008326  | 1.457829  | -1.106888 |
| H | 2.561651  | -2.101754 | -3.301911 |
| H | 3.363576  | -0.560138 | -3.019573 |
| H | 1.605243  | -0.670834 | -2.899630 |
| H | 4.732629  | 2.200115  | -0.760388 |
| H | 3.143917  | 1.988568  | -1.505183 |
| H | 4.471592  | 0.910358  | -1.928057 |

Ts2:

|   |           |           |           |
|---|-----------|-----------|-----------|
| P | 0.543497  | 0.041940  | 0.099082  |
| O | 0.765610  | -0.644581 | -1.365295 |
| O | -1.597121 | -0.605215 | -0.344510 |
| O | 0.161671  | 1.476167  | 0.188811  |
| O | 0.144936  | -1.048127 | 1.194088  |
| C | -2.609050 | 0.340508  | -0.335256 |
| H | -0.819584 | -1.167550 | 0.900857  |
| H | 1.720646  | -0.691879 | -1.483394 |
| C | -3.943670 | -0.288112 | 0.143636  |
| C | -2.698952 | 1.090740  | -1.693193 |
| H | -2.394457 | 1.136980  | 0.398874  |
| O | 2.191212  | 0.056163  | 0.474906  |
| H | 2.376312  | 0.970881  | 0.703249  |
| H | -3.600369 | 1.716964  | -1.705596 |
| C | -2.633638 | 0.215313  | -2.948757 |
| H | -1.844654 | 1.769908  | -1.709610 |
| H | -4.727384 | 0.479408  | 0.136502  |
| H | -3.791239 | -0.563921 | 1.191978  |
| C | -4.419520 | -1.532804 | -0.612513 |
| H | -2.491582 | 0.829491  | -3.843008 |
| H | -3.538152 | -0.376087 | -3.099209 |
| H | -1.792254 | -0.471012 | -2.863008 |
| H | -5.227138 | -2.037318 | -0.073996 |
| H | -3.591117 | -2.231689 | -0.726813 |
| H | -4.793505 | -1.290769 | -1.608027 |

Im3:

|   |           |           |           |
|---|-----------|-----------|-----------|
| P | 1.224613  | -0.146357 | 0.500528  |
| O | 2.591162  | -0.133037 | -0.431596 |
| O | -1.761271 | -0.889538 | -1.667499 |
| O | 0.786545  | 1.278657  | 0.654822  |

|   |           |           |           |
|---|-----------|-----------|-----------|
| O | 0.349272  | -1.245568 | -0.004264 |
| C | -2.427825 | 0.225360  | -1.094874 |
| H | -0.968137 | -1.072660 | -1.109823 |
| H | 2.814436  | 0.792947  | -0.559512 |
| C | -3.290628 | -0.194490 | 0.113761  |
| C | -3.158683 | 0.986508  | -2.216386 |
| H | -1.680229 | 0.914985  | -0.689205 |
| O | 1.812273  | -0.655047 | 1.957441  |
| H | 1.967080  | 0.137108  | 2.479310  |
| H | -3.757165 | 0.701580  | 0.538056  |
| H | -2.589331 | -0.560307 | 0.866354  |
| C | -4.348641 | -1.273822 | -0.133729 |
| H | -3.792371 | 1.756540  | -1.764536 |
| C | -3.973253 | 0.139764  | -3.200695 |
| H | -2.391187 | 1.516019  | -2.786733 |
| H | -4.309837 | 0.750605  | -4.042455 |
| H | -4.857235 | -0.302347 | -2.742611 |
| H | -3.359507 | -0.670909 | -3.590410 |
| H | -4.737878 | -1.656319 | 0.812873  |
| H | -3.912477 | -2.109582 | -0.680587 |
| H | -5.198827 | -0.900588 | -0.706530 |

Models used for the hydrolysis of **3-tetrahydrofuranoyl-arsenate** monoanion:

Im1:

|    |           |           |           |
|----|-----------|-----------|-----------|
| As | 0.092662  | 0.446469  | -0.011307 |
| O  | -0.845572 | 0.329752  | -1.362495 |
| O  | 1.640560  | -0.470578 | -0.273434 |
| O  | -0.484848 | 0.069515  | 1.495730  |
| O  | 0.849346  | 2.072263  | 0.065077  |
| H  | 0.960946  | 2.252578  | 1.005238  |
| H  | -2.677417 | -0.229406 | -0.455881 |
| O  | -3.163126 | -0.472780 | 0.349089  |
| H  | -2.460724 | -0.369725 | 1.013110  |
| C  | 2.970296  | -2.459423 | -0.084274 |
| O  | 3.331707  | -2.997885 | -1.368301 |
| C  | 2.326303  | -2.608399 | -2.317375 |
| C  | 1.040301  | -2.510006 | -1.509452 |
| C  | 1.545470  | -1.892528 | -0.194353 |
| H  | 3.034854  | -3.269009 | 0.645970  |
| H  | 2.307642  | -3.365066 | -3.101427 |
| H  | 2.580464  | -1.640427 | -2.760507 |
| H  | 0.636273  | -3.507309 | -1.320271 |
| H  | 0.271065  | -1.888190 | -1.962532 |
| H  | 3.659096  | -1.661987 | 0.199144  |
| H  | 0.931300  | -2.174759 | 0.662651  |

Ts1:

|    |           |           |           |
|----|-----------|-----------|-----------|
| As | -0.188743 | 0.048387  | 0.051209  |
| O  | -0.688597 | -0.929719 | -1.286663 |
| O  | 1.546570  | 0.401064  | -0.494277 |
| O  | -0.019883 | -0.542436 | 1.578148  |
| O  | -0.575933 | 1.778647  | -0.172754 |
| H  | 0.277869  | 2.175444  | -0.386678 |

|   |           |           |           |
|---|-----------|-----------|-----------|
| H | -1.771453 | -0.835241 | -0.853262 |
| O | -2.481902 | -0.249002 | 0.042540  |
| H | -2.560701 | -0.824781 | 0.808771  |
| C | 3.925023  | 0.118860  | -0.282310 |
| O | 4.511315  | -0.311550 | -1.525479 |
| C | 3.525333  | -1.059658 | -2.255105 |
| C | 2.632045  | -1.680876 | -1.191557 |
| C | 2.545844  | -0.547484 | -0.152933 |
| H | 4.600277  | -0.177140 | 0.524157  |
| H | 4.057359  | -1.782347 | -2.874220 |
| H | 2.948108  | -0.391978 | -2.902295 |
| H | 3.118692  | -2.555375 | -0.752191 |
| H | 1.642403  | -1.956284 | -1.548937 |
| H | 3.813243  | 1.204243  | -0.276916 |
| H | 2.365634  | -0.922170 | 0.855552  |

Im2:

|    |           |           |           |
|----|-----------|-----------|-----------|
| As | 0.989553  | -0.141857 | 0.091055  |
| O  | 0.858216  | 1.468332  | -0.726580 |
| O  | -0.806367 | -0.471270 | -0.505916 |
| O  | 0.732219  | -0.343533 | 1.719848  |
| O  | 1.389882  | -1.450865 | -1.069720 |
| H  | 0.520337  | -1.740942 | -1.374415 |
| H  | 1.752229  | 1.819732  | -0.626423 |
| O  | 2.835151  | 0.204511  | 0.224115  |
| H  | 2.975743  | 0.098299  | 1.170699  |
| C  | -3.098245 | -0.970091 | 0.048948  |
| O  | -4.015453 | -0.244170 | -0.796282 |
| C  | -3.375685 | 0.972609  | -1.210799 |
| C  | -2.415860 | 1.320441  | -0.082725 |
| C  | -1.877209 | -0.069812 | 0.315978  |
| H  | -3.630950 | -1.227022 | 0.968084  |
| H  | -4.160537 | 1.710795  | -1.381848 |
| H  | -2.828390 | 0.811386  | -2.145589 |
| H  | -2.962055 | 1.770177  | 0.751196  |
| H  | -1.600879 | 1.975258  | -0.380076 |
| H  | -2.777734 | -1.885972 | -0.449822 |
| H  | -1.570064 | -0.107004 | 1.361970  |

Ts2:

|    |           |           |           |
|----|-----------|-----------|-----------|
| As | 0.560631  | 0.063241  | 0.064550  |
| O  | 0.826555  | -0.875671 | -1.434627 |
| O  | -1.786741 | -0.585795 | -0.328052 |
| O  | 0.266000  | 1.670840  | -0.090489 |
| O  | -0.107087 | -0.953239 | 1.287573  |
| H  | -1.084363 | -0.965038 | 0.773133  |
| H  | 1.779671  | -1.025832 | -1.446390 |
| O  | 2.315172  | -0.012269 | 0.560381  |
| H  | 2.575492  | 0.912801  | 0.625759  |
| C  | -4.166284 | -0.205379 | -0.015182 |
| O  | -4.810705 | -0.162878 | -1.306674 |
| C  | -3.871411 | 0.355743  | -2.263486 |
| C  | -2.923759 | 1.231142  | -1.458677 |
| C  | -2.751498 | 0.401100  | -0.168246 |
| H  | -4.789064 | 0.360891  | 0.685769  |

|   |           |           |           |
|---|-----------|-----------|-----------|
| H | -4.444175 | 0.889715  | -3.024105 |
| H | -3.326713 | -0.467183 | -2.736640 |
| H | -3.392268 | 2.195105  | -1.239786 |
| H | -1.959041 | 1.403037  | -1.928152 |
| H | -4.089486 | -1.240498 | 0.321429  |
| H | -2.528323 | 1.062365  | 0.681514  |

Im3:

|    |           |           |           |
|----|-----------|-----------|-----------|
| As | 1.187467  | -0.331019 | 0.827660  |
| O  | 2.094006  | 1.216883  | 1.032069  |
| O  | -2.659221 | -0.852697 | 0.501398  |
| O  | 2.262794  | -1.548423 | 1.128272  |
| O  | -0.285103 | -0.100131 | 1.534951  |
| H  | -1.790635 | -0.652006 | 0.929547  |
| H  | 3.015613  | 0.945726  | 1.109083  |
| O  | 0.899681  | -0.335279 | -0.961656 |
| H  | 1.520949  | -0.987447 | -1.304580 |
| C  | -2.987392 | 1.411668  | -0.397730 |
| O  | -4.409268 | 1.642715  | -0.540200 |
| C  | -5.054915 | 0.390644  | -0.785288 |
| C  | -3.993881 | -0.482661 | -1.446520 |
| C  | -2.728411 | -0.080365 | -0.680277 |
| H  | -2.471235 | 2.058804  | -1.110589 |
| H  | -5.926748 | 0.584043  | -1.412675 |
| H  | -5.388570 | -0.056010 | 0.157575  |
| H  | -3.897704 | -0.223902 | -2.503080 |
| H  | -4.183936 | -1.550318 | -1.353588 |
| H  | -2.667160 | 1.663690  | 0.612304  |
| H  | -1.820127 | -0.209015 | -1.272973 |

Models used for the hydrolysis of **3-tetrahydrofuranoyl-phosphate** monoanion:

Im1:

|   |           |           |           |
|---|-----------|-----------|-----------|
| P | 0.153234  | 0.431702  | -0.027815 |
| O | -0.714215 | 0.319232  | -1.237617 |
| O | 1.555739  | -0.425963 | -0.270587 |
| O | -0.368687 | 0.098646  | 1.340343  |
| O | 0.826300  | 1.924092  | 0.004257  |
| H | 1.049896  | 2.114197  | 0.920003  |
| H | -2.558905 | -0.322168 | -0.453278 |
| O | -3.028971 | -0.599607 | 0.349410  |
| H | -2.321352 | -0.452001 | 0.999010  |
| C | 2.894435  | -2.408906 | -0.050544 |
| O | 3.282620  | -2.950932 | -1.326005 |
| C | 2.292553  | -2.570538 | -2.295327 |
| C | 0.992074  | -2.467126 | -1.511961 |
| C | 1.471084  | -1.846993 | -0.189281 |
| H | 2.947074  | -3.216556 | 0.682688  |
| H | 2.289145  | -3.333452 | -3.073768 |
| H | 2.553776  | -1.605901 | -2.741841 |
| H | 0.581190  | -3.462398 | -1.327650 |
| H | 0.233751  | -1.840456 | -1.975033 |
| H | 3.576666  | -1.609714 | 0.243468  |
| H | 0.839194  | -2.122058 | 0.655929  |

Ts1:

|   |           |           |           |
|---|-----------|-----------|-----------|
| P | -0.140237 | 0.055599  | 0.022694  |
| O | -0.569283 | -0.855989 | -1.211501 |
| O | 1.457622  | 0.357874  | -0.502011 |
| O | 0.016809  | -0.499285 | 1.394243  |
| O | -0.533998 | 1.622418  | -0.177964 |
| H | 0.289243  | 2.073802  | -0.395597 |
| H | -1.588846 | -0.862289 | -0.899429 |
| O | -2.371767 | -0.187934 | 0.103805  |
| H | -2.431488 | -0.713477 | 0.905578  |
| C | 3.839509  | 0.127787  | -0.258098 |
| O | 4.464153  | -0.285308 | -1.488975 |
| C | 3.508454  | -1.043392 | -2.247197 |
| C | 2.602165  | -1.689273 | -1.209566 |
| C | 2.473768  | -0.570593 | -0.159959 |
| H | 4.504122  | -0.154553 | 0.561617  |
| H | 4.066971  | -1.751132 | -2.860334 |
| H | 2.934866  | -0.379878 | -2.902363 |
| H | 3.094052  | -2.559789 | -0.768358 |
| H | 1.624879  | -1.976306 | -1.588452 |
| H | 3.703290  | 1.210344  | -0.252623 |
| H | 2.278214  | -0.958025 | 0.839291  |

Im2:

|   |           |           |           |
|---|-----------|-----------|-----------|
| P | 0.961308  | -0.134446 | 0.067048  |
| O | 0.807985  | 1.352762  | -0.654949 |
| O | -0.750502 | -0.444719 | -0.480024 |
| O | 0.720905  | -0.350009 | 1.539219  |
| O | 1.337403  | -1.327400 | -1.000154 |
| H | 0.485380  | -1.650792 | -1.316673 |
| H | 1.682971  | 1.745760  | -0.553764 |
| O | 2.689287  | 0.190998  | 0.201784  |
| H | 2.846868  | 0.041225  | 1.136988  |
| C | -3.033987 | -0.961376 | 0.090819  |
| O | -3.974858 | -0.276147 | -0.764074 |
| C | -3.356138 | 0.933098  | -1.228460 |
| C | -2.391479 | 1.334808  | -0.123256 |
| C | -1.824908 | -0.032842 | 0.320746  |
| H | -3.554275 | -1.204137 | 1.020782  |
| H | -4.153502 | 1.653024  | -1.419820 |
| H | -2.814676 | 0.745596  | -2.162111 |
| H | -2.938196 | 1.806040  | 0.698684  |
| H | -1.588518 | 1.989282  | -0.450379 |
| H | -2.701051 | -1.883861 | -0.387220 |
| H | -1.516116 | -0.027866 | 1.366514  |

Ts2:

|   |           |           |           |
|---|-----------|-----------|-----------|
| P | 0.472694  | -0.002628 | 0.135781  |
| O | 0.618227  | -0.492149 | -1.413434 |
| O | -1.721930 | -0.514336 | -0.308773 |
| O | 0.140815  | 1.416727  | 0.424999  |
| O | 0.058399  | -1.210607 | 1.090798  |
| H | -0.919669 | -1.252633 | 0.832959  |
| H | 1.565987  | -0.552171 | -1.576219 |

|   |           |           |           |
|---|-----------|-----------|-----------|
| O | 2.126990  | -0.097425 | 0.452452  |
| H | 2.355942  | 0.765704  | 0.806970  |
| C | -4.083850 | -0.072784 | 0.034322  |
| O | -4.780413 | -0.139445 | -1.230672 |
| C | -3.865805 | 0.252846  | -2.267347 |
| C | -2.875081 | 1.187998  | -1.592753 |
| C | -2.664461 | 0.489367  | -0.224369 |
| H | -4.673538 | 0.566227  | 0.700632  |
| H | -4.456247 | 0.711819  | -3.063166 |
| H | -3.349984 | -0.627116 | -2.665027 |
| H | -3.316563 | 2.181445  | -1.464643 |
| H | -1.925561 | 1.278507  | -2.114605 |
| H | -4.008572 | -1.073760 | 0.462561  |
| H | -2.404783 | 1.236614  | 0.539134  |

Im3:

|   |           |           |           |
|---|-----------|-----------|-----------|
| P | 1.100433  | -0.096807 | 0.130727  |
| O | 2.419093  | -0.250445 | -0.854675 |
| O | -2.268841 | -0.980244 | -1.217183 |
| O | 0.670446  | 1.338081  | 0.067186  |
| O | 0.196313  | -1.252895 | -0.144494 |
| H | -1.362471 | -1.155174 | -0.865445 |
| H | 2.633180  | 0.638474  | -1.150733 |
| O | 1.757294  | -0.366261 | 1.620027  |
| H | 1.957608  | 0.496369  | 1.993595  |
| C | -3.263427 | 0.118305  | 0.742725  |
| O | -4.703469 | 0.016953  | 0.623998  |
| C | -5.049508 | 0.009125  | -0.764190 |
| C | -3.911789 | 0.743988  | -1.464799 |
| C | -2.687552 | 0.259568  | -0.678394 |
| H | -3.038435 | 0.989389  | 1.361989  |
| H | -6.022653 | 0.492941  | -0.866429 |
| H | -5.125504 | -1.020747 | -1.129746 |
| H | -4.033421 | 1.823328  | -1.351869 |
| H | -3.818340 | 0.501519  | -2.521648 |
| H | -2.868309 | -0.776589 | 1.222012  |
| H | -1.864447 | 0.976020  | -0.688951 |
